# Supplementary material for: Exploring the Influence of ZnF2 on Zinc-Tellurite Glass: Unveiling Changes in OH Content, Structure, and Optical Properties
Source: PubMed Central journal article supplement — ACS Omega. 2023 Sep 13;8(38):35266–74. doi: 10.1021/acsomega.3c05010 (PMC10536076; doi:10.1021/acsomega.3c05010), 2023-09-13
Supplement: ao3c05010_si_001.pdf [file ao3c05010_si_001.pdf]

## SUPPORTING INFORMATION

---

### **Exploring the influence of ZnF<sub>2</sub> on zinc-tellurite glass: Unveiling changes in OH content, structure, and optical properties**

*Renato Grigolon Capelo<sup>1#</sup>, Ricardo Santos Baltieri<sup>1#</sup>, Marcos de Oliveira Jr.<sup>2</sup>, Danilo Manzani<sup>1\*</sup>*

*<sup>1</sup>São Carlos Institute of Chemistry - IQSC, University of São Paulo - USP, São Carlos, SP, Brazil*

*<sup>2</sup>São Carlos Institute of Physics – IFSC, University of São Paulo – USP, São Carlos, SP, Brazil*

# Equally contributing authors

\*Corresponding author: [dmanzani@usp.br](mailto:dmanzani@usp.br)

---

## Supplementary figures

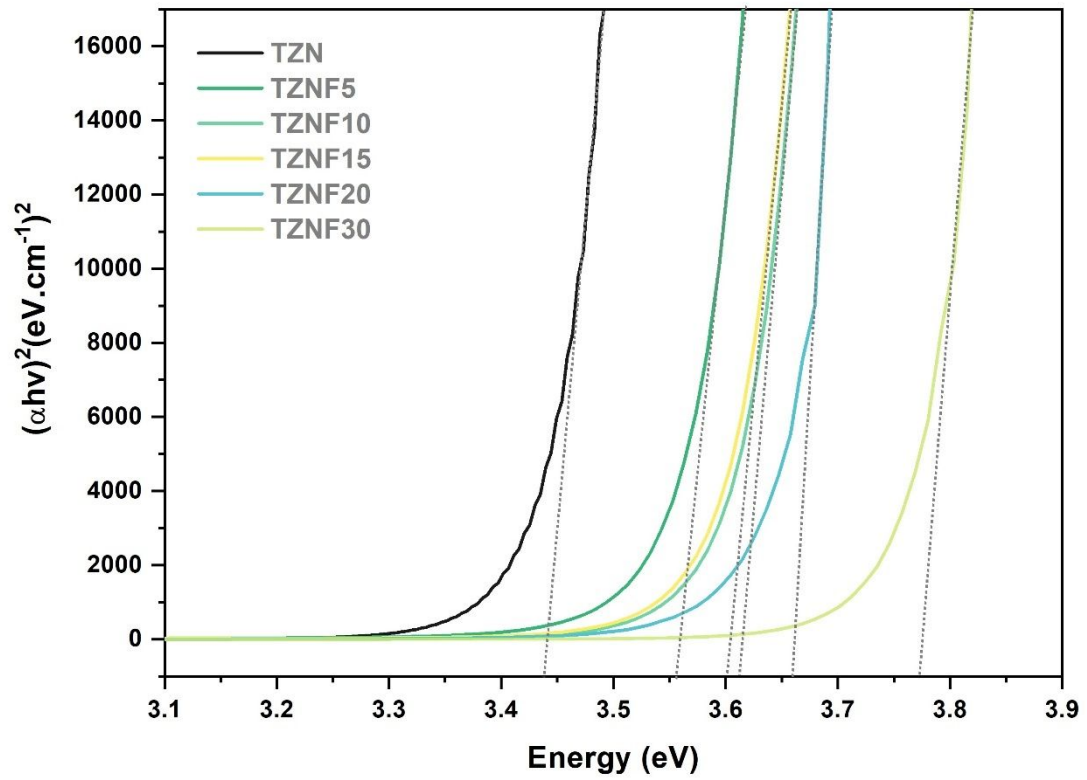

**Figure S1.** Bandgap energy curves calculated by Plot Tauc method.

**Table S1.** Bandgap energy values calculated for all undoped glass samples.

| Samples | Bandgap Energy (eV) |
|---------|---------------------|
| TZN     | 3.43                |
| TZNF5   | 3.56                |
| TZNF10  | 3.60                |
| TZNF15  | 3.61                |
| TZNF20  | 3.65                |
| TZNF30  | 3.76                |

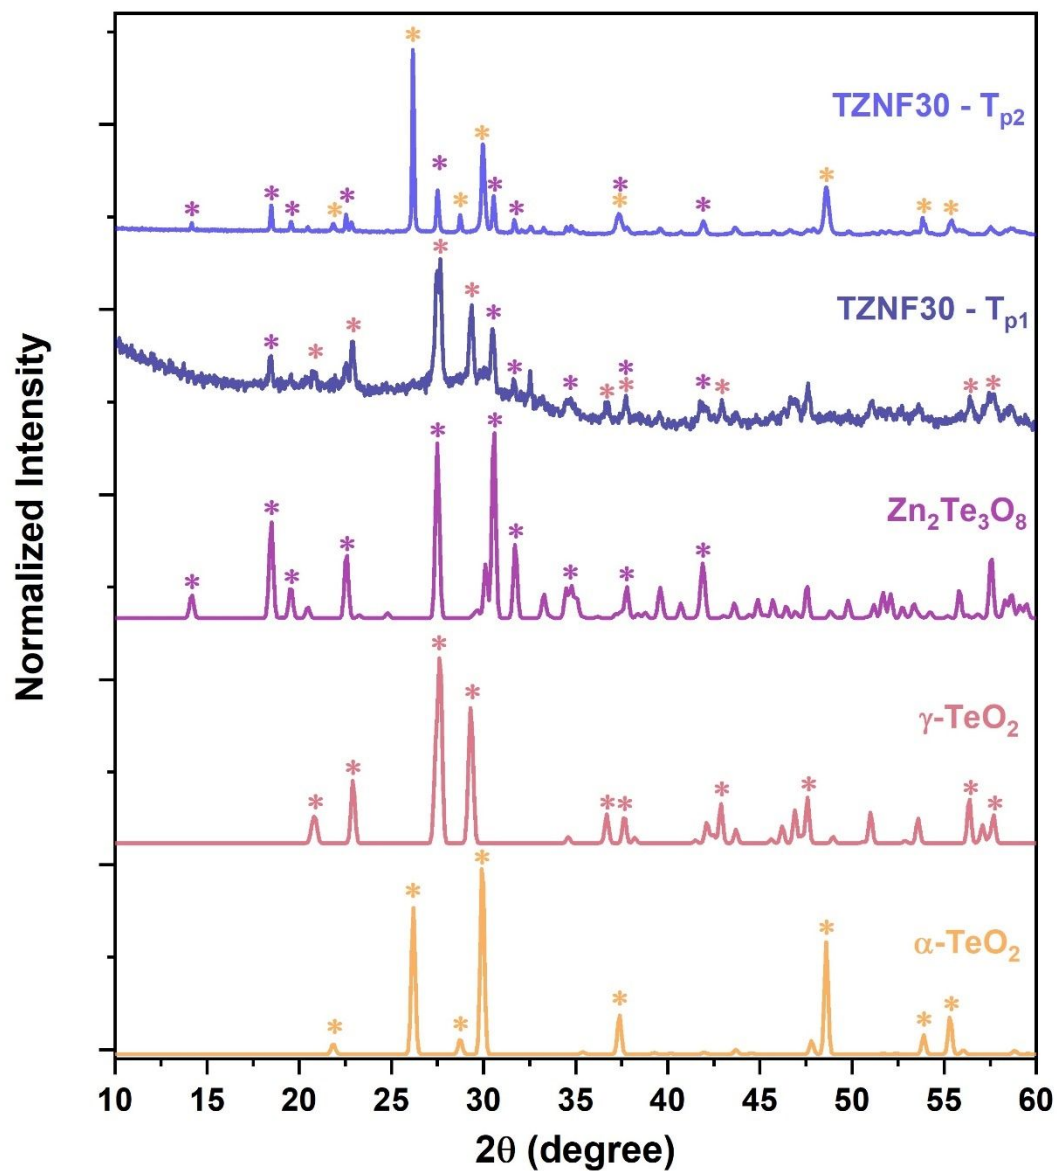

**Figure S2.** XRD diffractograms of TZNF30 sample treated at  $T_{p1} = 347\text{ }^{\circ}\text{C}$  and  $T_{p2} = 406\text{ }^{\circ}\text{C}$  and the diffraction patterns of  $\alpha\text{-TeO}_2$ ,  $\gamma\text{-TeO}_2$ , and  $\text{Zn}_2\text{Te}_3\text{O}_8$  phases.

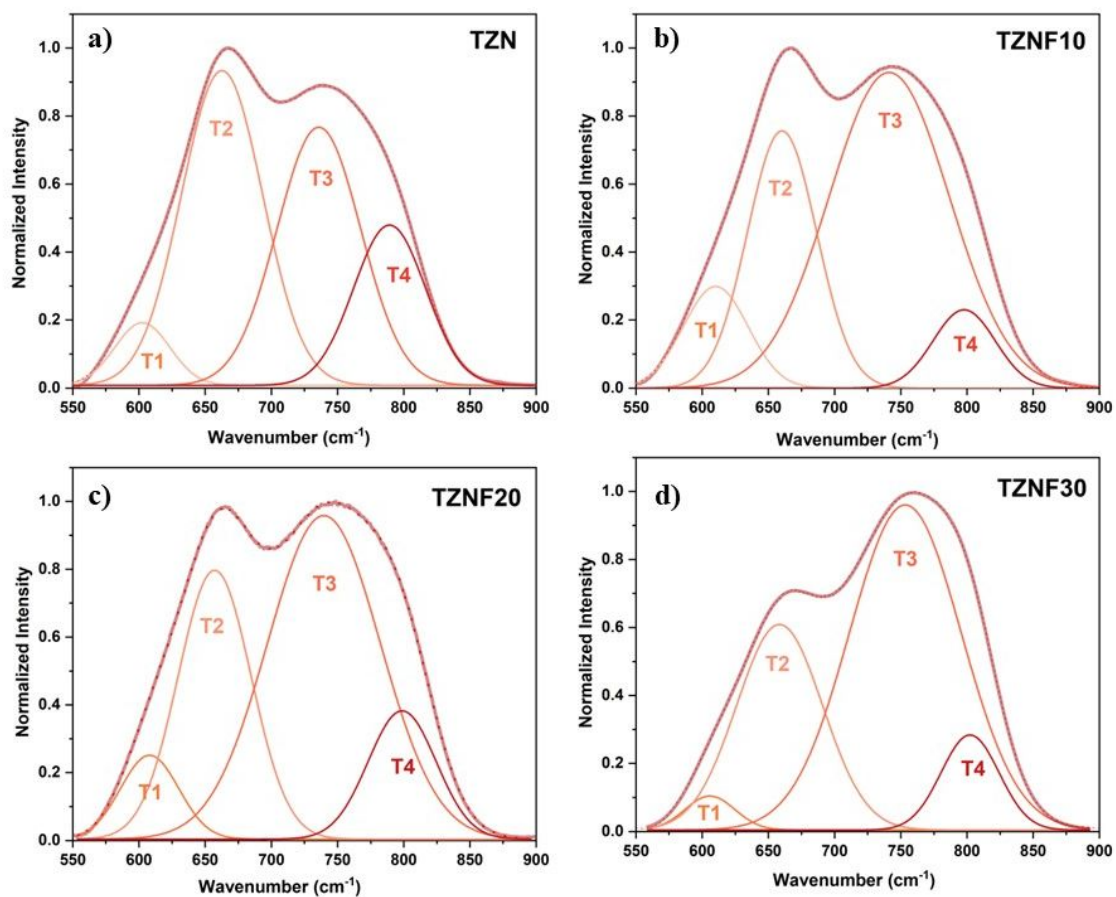

**Figure S3.** Representative Raman deconvoluted bands between 550 to 900 cm<sup>-1</sup> (tellurite bands) for the (a) TZN, (b) TZNF10, (c) TZNF20, and (d) TZNF30 samples.

**Table S2.** Raman deconvoluted bands area in percent of the integral as obtained from the deconvolution of each Raman spectra.

| Sample | Area ( $\pm 0.5\%$ )       |                            |                            |                            |
|--------|----------------------------|----------------------------|----------------------------|----------------------------|
|        | T1 (610 cm <sup>-1</sup> ) | T2 (660 cm <sup>-1</sup> ) | T3 (715 cm <sup>-1</sup> ) | T4 (755 cm <sup>-1</sup> ) |
| TZN    | 5.6                        | 41.1                       | 34.7                       | 18.6                       |
| TZNF5  | 6.7                        | 38.0                       | 35.6                       | 19.6                       |
| TZNF10 | 9.8                        | 26.5                       | 56.5                       | 7.2                        |
| TZNF15 | 9.5                        | 25.7                       | 57.6                       | 7.1                        |
| TZNF20 | 7.0                        | 28.2                       | 52.3                       | 12.5                       |
| TZNF30 | 2.7                        | 28.9                       | 59.3                       | 9.1                        |
